# Supplementary material for: Phase II Trial of Ipilimumab with Stereotactic Radiation Therapy for Metastatic Disease: Outcomes, Toxicities, and Low-Dose Radiation–Related Abscopal Responses
Source: Oxford University Press journal article supplement (doi:10.1158/2326-6066.cir-18-0793), 2019-10-28
Supplement: 23266066cir180793-sup-211668_4_supp_5731382_pwpddr.docx [file 23266066cir180793-sup-211668_4_supp_5731382_pwpddr.docx]

**Supplementary Table S3.** Hepatic lesions measured at baseline for patients with evaluable imaging

| Characteristics | All Evaluable Patients  (n=95) | Group 1: Liver 50/4  Concurrent  (n=19) | Group 2: Liver 50/4  Sequential  (n=17) | Group 3: Lung 50/4  Concurrent  (n=21) | Group 4: Lung 50/4  Sequential  (n=19) | Group 5: Liver, Lung, or Adrenal 60/10  Sequential  (n=19) |
| --- | --- | --- | --- | --- | --- | --- |
| Patients with hepatic  lesions at baseline | 56 (59%) | 19 (100%) | 17 (100%) | 5 (24%) | 6 (32%) | 9 (47%) |
| Median number of hepatic lesions per patient with lesions (Range) | 2 (1-6) | 2 (1-6) | 3 (1-6) | 1 (1-2) | 2 (1-3) | 3 (1-5) |
